# Supplementary material for: Feedback regulation by trehalose 6‐phosphate slows down starch mobilization below the rate that would exhaust starch reserves at dawn in Arabidopsis leaves
Source: PubMed Central journal article supplement (PMC6508811; doi:10.1002/pld3.78), 2018-08-13
Supplement: PLD3-2-e00078-s001.pdf [file PLD3-2-e00078-s001.pdf]

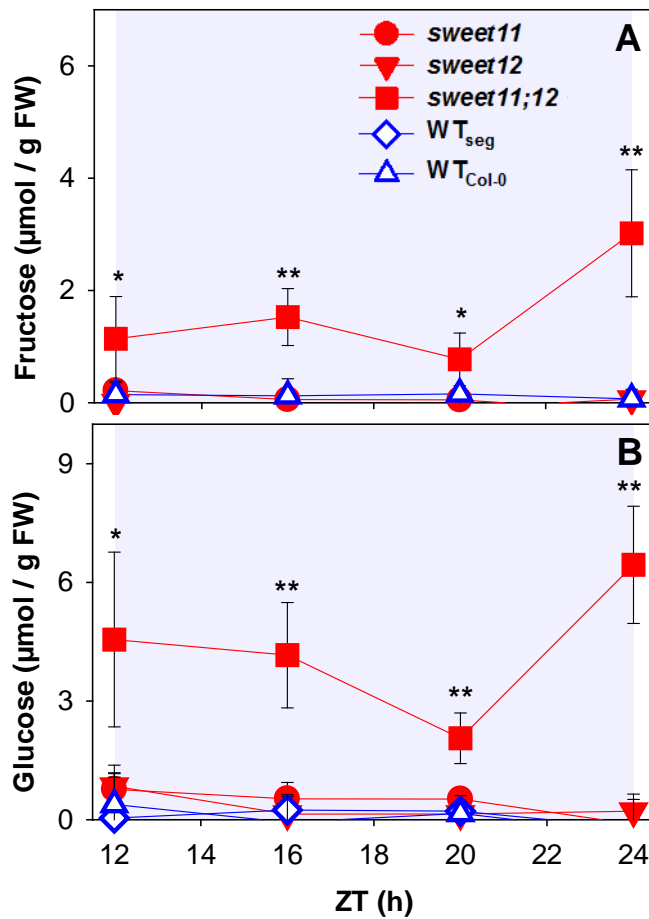

**Supplemental Figure S1. Levels of glucose and fructose in the Arabidopsis *sweet* mutants; additional data to the experiment shown in Fig. 1.** Rosettes from *sweet11* and *sweet12* mutants, *sweet11;12* double mutant, wild-type segregant (WT<sub>seg</sub>) and wild type Col-0 (WT<sub>Col-0</sub>) plants were harvested at various time points during the night. (A) Fructose, (B) Glucose. Values shown are mean  $\pm$  SD ( $n = 3$ ). Significant differences between *sweet11;12* and WT<sub>Col-0</sub> samples, using Student's t-test, are indicated by asterisks \* ( $P < 0.05$ ), \*\* ( $P < 0.01$ ) and \*\*\* ( $P < 0.001$ ).

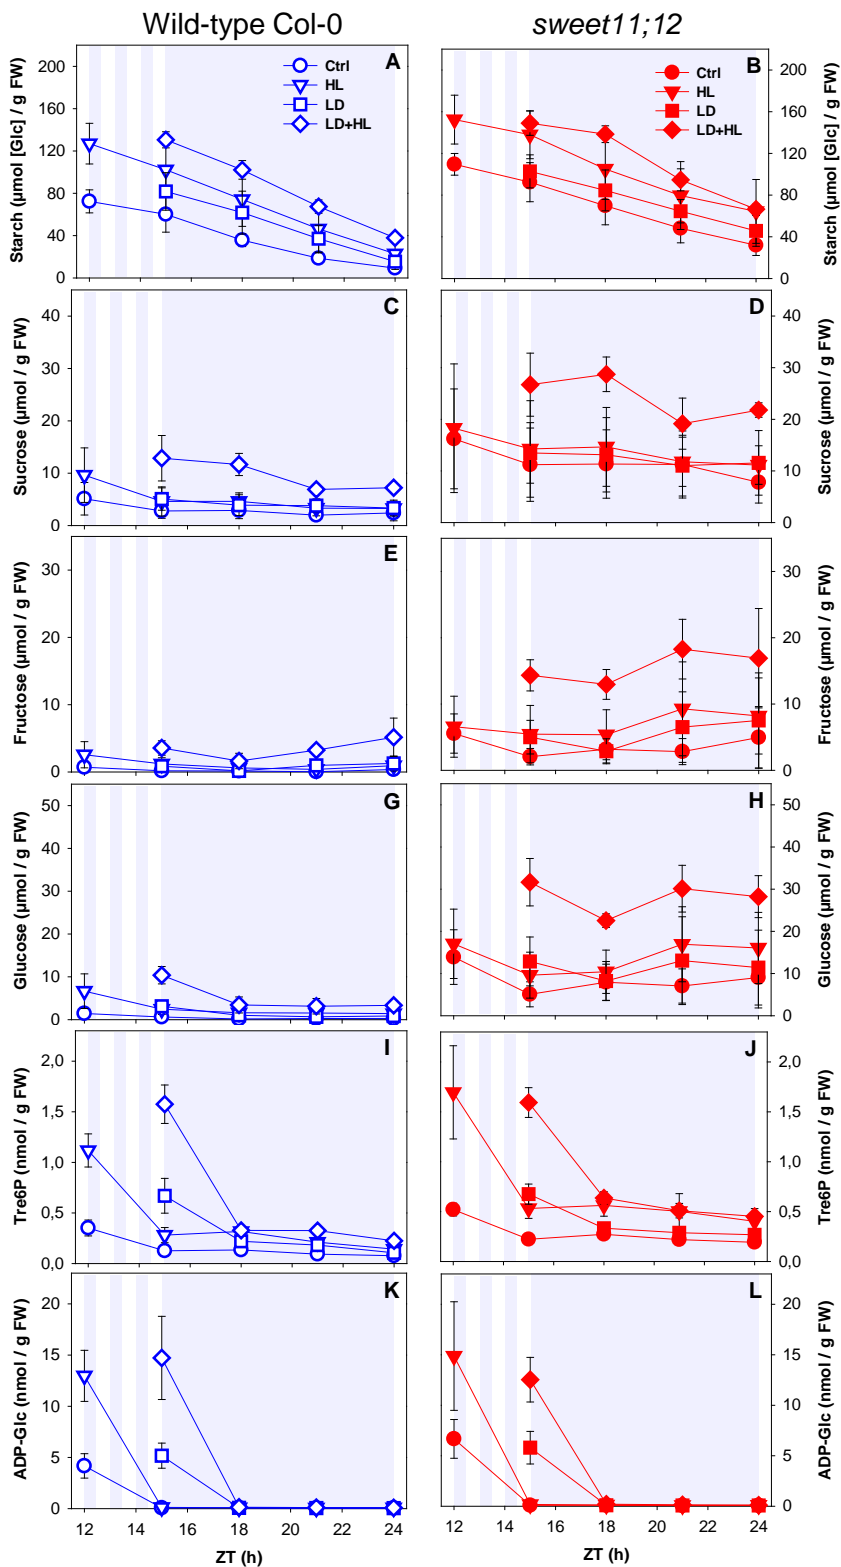

**Supplemental Figure S2. Effect of impaired phloem loading in the *sweet11;12* double mutant on night-time metabolite levels.** Wild-type Col-0 plants (left column) and *sweet11;12* double mutants (right column) were grown under standard conditions (Ctrl – 12-h(12-h light/dark, 21°C and 160  $\mu\text{mol m}^{-2} \text{s}^{-1}$  PFD). Three weeks after germination, batches of plants were left in standard conditions (Ctrl) or were shifted for a single day either to a long-day (LD, 15-h photoperiod, 21°C, 160  $\mu\text{mol m}^{-2} \text{s}^{-1}$  PFD), or to high-light (HL, 12-h photoperiod, 21°C, 320  $\mu\text{mol m}^{-2} \text{s}^{-1}$  PFD), or a combined long-day and high-light (LD+HL). Samples were collected at the end of the light period (ED) after the shift, and throughout the following dark period at 3-h intervals, up to the end of the night (EN) for metabolite analysis. Values are means  $\pm$ SD (n=10) taken from two independent experiments. ZT, zeitgeber time (hours after dawn). The hatched area denotes when plants were in darkness in the 12-h light/12-h dark and still in light in the 15-h light/9-h dark treatments. The original data are provided in Suppl. Table S2

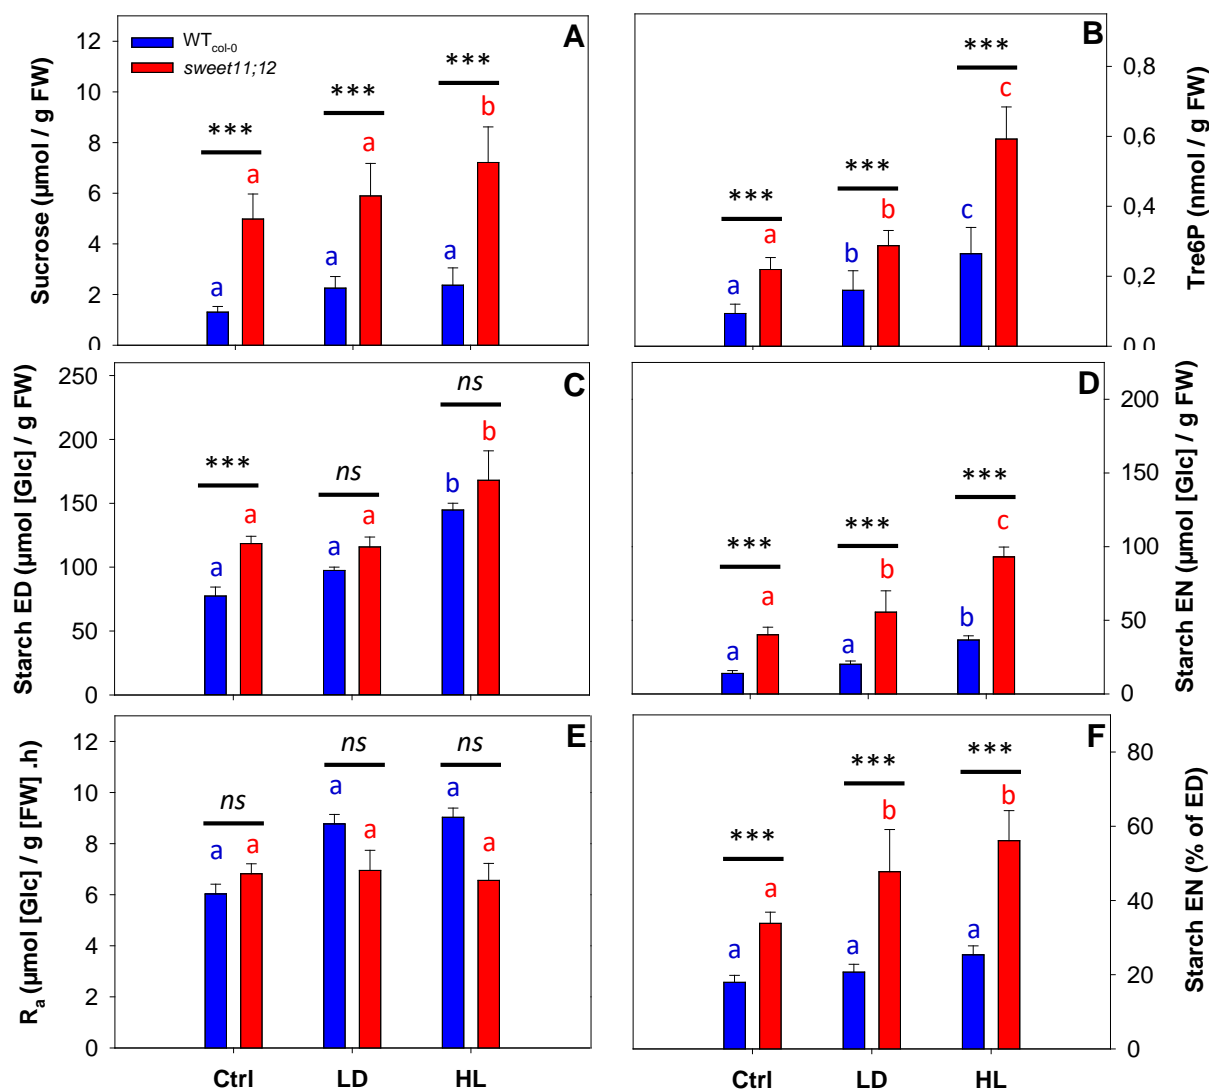

**Supplemental Figure S3. Night-time metabolite levels in Col-0 and the *sweet11;12* double mutant exposed in the previous light period to a long day (LD) or high light (HL); the experiment was performed as in Fig. 2, but omitted the combined LD+HL treatment.** Wild-type Col-0 plants (WT) and *sweet11;12* double mutants were grown under standard condition (Ctrl – 12-h/12-h light/dark, 21°C and 160  $\mu\text{mol m}^{-2} \text{s}^{-1}$  PFD). Three weeks after germination, batches of plants were shifted for a single day either to a long-day (LD, 15-h photoperiod, 21°C, 160  $\mu\text{mol m}^{-2} \text{s}^{-1}$  PFD) or high-light condition (HL, 12-h photoperiod, 21°C, 320  $\mu\text{mol m}^{-2} \text{s}^{-1}$  PFD). Metabolites were quantified at the end of the day (ED) after the shift, and throughout the dark period at 3-h intervals up to the end of the night (EN). (A) Night-time sucrose and (B) night-time Tre6P levels are averages from ZT15 to ZT24; (C) starch content at ED; (D) starch content at EN; (E) Absolute rate of starch mobilization ( $R_a$ ) estimated as the slope of the linear regression of all starch values; (F) Starch content at EN expressed as the percentage of starch content at ED. Sucrose and starch were measured enzymatically. Tre6P was determined by LC-MS/MS. Values are means  $\pm$ SD (n=5). Asterisks indicate statistically significant genotype-dependent differences in a given treatment: \*  $P < 0.05$ , \*\* ( $P < 0.01$ ) and \*\*\* ( $P < 0.001$ ). Letters indicate significant treatment-dependent differences in a given genotype: blue letters indicate treatment differences within WT<sub>Col-0</sub> and red letters indicate differences within *sweet11;12* double mutant (one-way ANOVA, Holm-Sidak post hoc pairwise multiple comparison testing,  $P < 0.01$ ). ZT, zeitgeber time (hours after dawn).

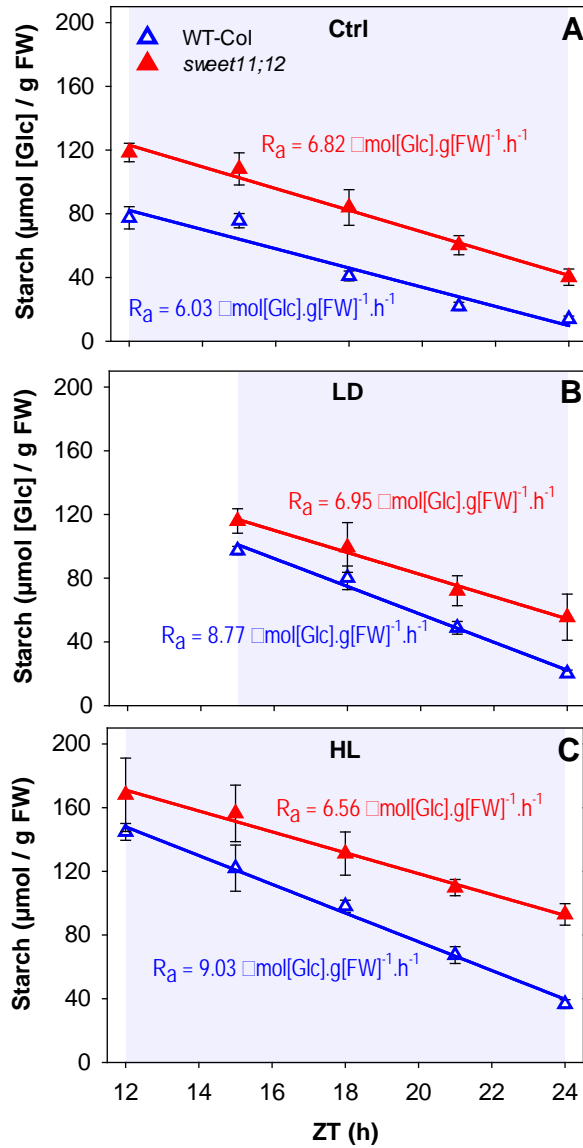

**Supplemental Figure S4. Time resolved starch content and estimation of starch mobilization rates in wild-type plants and *sweet11;12* mutants; a further analysis of the data from Suppl. Fig. S3.** Wild-type Col-0 plants (WT) and *sweet11;12* double mutants were grown at (A) control standard condition (Ctrl, 12h-L/D cycle, 21°C, 160 μmol m<sup>-2</sup> s<sup>-1</sup> PFD). Three weeks after germination, part of the plants were shifted for one single day to (B) long-day condition (LD, 15hL/9hD cycle, 21°C, 160 μmol m<sup>-2</sup> s<sup>-1</sup> PFD), or to (C) high-light condition (HL, 12h-L/D cycle, 21°C, 320 μmol m<sup>-2</sup> s<sup>-1</sup> PFD). Starch contents were quantified enzymatically at the end of the day (ED) after the shift, and throughout the following dark period at every 3h-interval, up to the end of the night (EN). (A) Lines represent linear regressions calculated for starch contents. Absolute starch mobilization rates ( $R_a$ ) are indicated in the panels. Values are means ±SD (n=5). ZT, Zeitgeber time (hours after dawn).

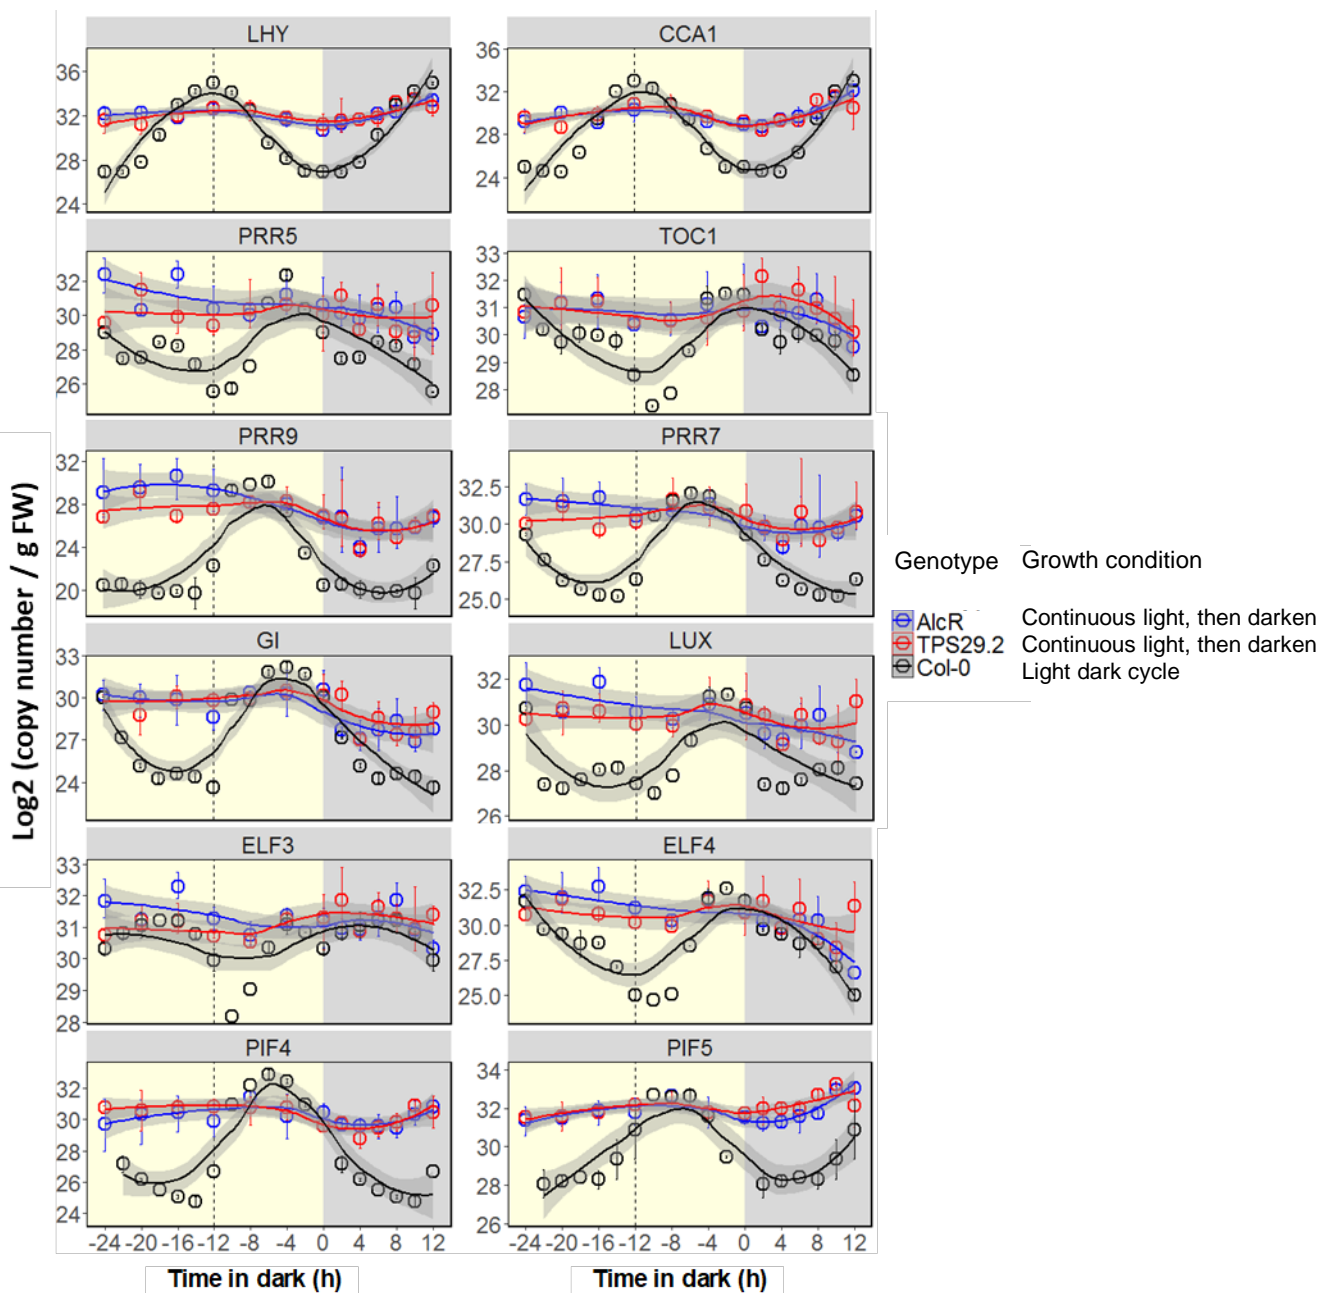

**Supplemental Figure S5. Clock gene transcript abundance in Col-0 germinated and grown in continuous light and then transferred to darkness for 12 h compared to Col-0 growing in a 12 h photoperiod; control data to the experiment shown in Fig. 8.** The empty-vector control AlcR and the inducible TPS-overexpressor line (*iTPS*) were grown from germination in continuous light and temperature ( $160 \mu\text{mol m}^{-2} \text{s}^{-1}$  PFD,  $21^\circ\text{C}$ ). Three weeks after germination, plants were darkened. Plants were induced 2 h prior to dusk by spraying with 2% (v/v) ethanol. Samples were harvested at 4h-intervals during the 24h prior to darkening and the first 12h hours after darkening. Transcripts were quantified in samples collected at 4h-intervals in the 24h prior to darkening and at 2h-interval in the first 12h hours after darkening. Transcripts were quantified by Real-Time qRT-PCR. Values are means  $\pm$ SD ( $n=5$ ). Control wild-type Col-0 data show the response expected in synchronized and entrained plants. The data is taken from Flis *et al.* (2015, 2016); the plants were grown in a 12 h photoperiod (about  $150 \mu\text{mol m}^{-2} \text{s}^{-1}$  PFD,  $21^\circ\text{C}$ ) for 21 days and were then harvested at 2-h intervals through a 24 h light-dark cycle (data is the mean of 2 biological replicates). The data sets are aligned on dusk, i.e., ZTO in the light-dark data series corresponds to 12 h before darkening in the continuous light treatment (the light-dark cycle data is concatenated). In all cases, transcript abundance is shown as number of copies per grams of fresh weight, on a log<sub>2</sub> scale.

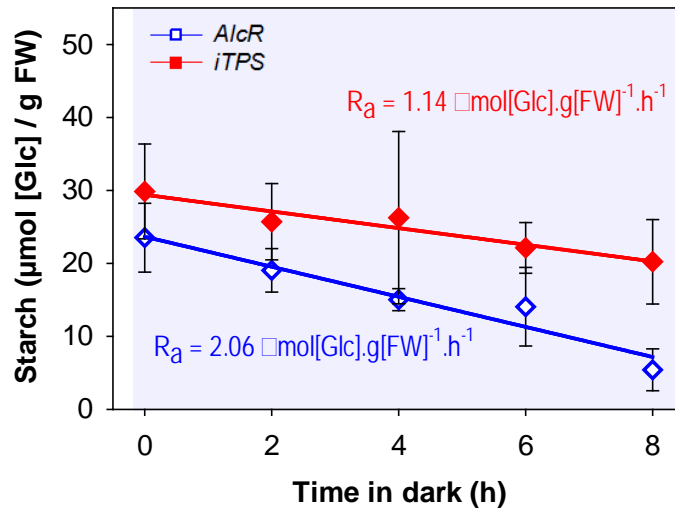

**Supplemental Figure S6. Effect of induced TPS overexpression on the rate of starch mobilization when plants germinated and grown in continuous light are suddenly transferred to darkness; this plot analyses the data in Fig. 8, plotting starch content immediately before darkening and during the first 8 h after darkening with a higher time resolution, and using regression to calculate the rate of starch mobilization.** For experimental details see the legends of Fig. 8 and Suppl. Fig. S5. Values are means  $\pm$ SD (n=4). Lines represent linear regressions calculated for starch contents; the absolute starch mobilization rates ( $R_a$ ) are indicated in the panels.

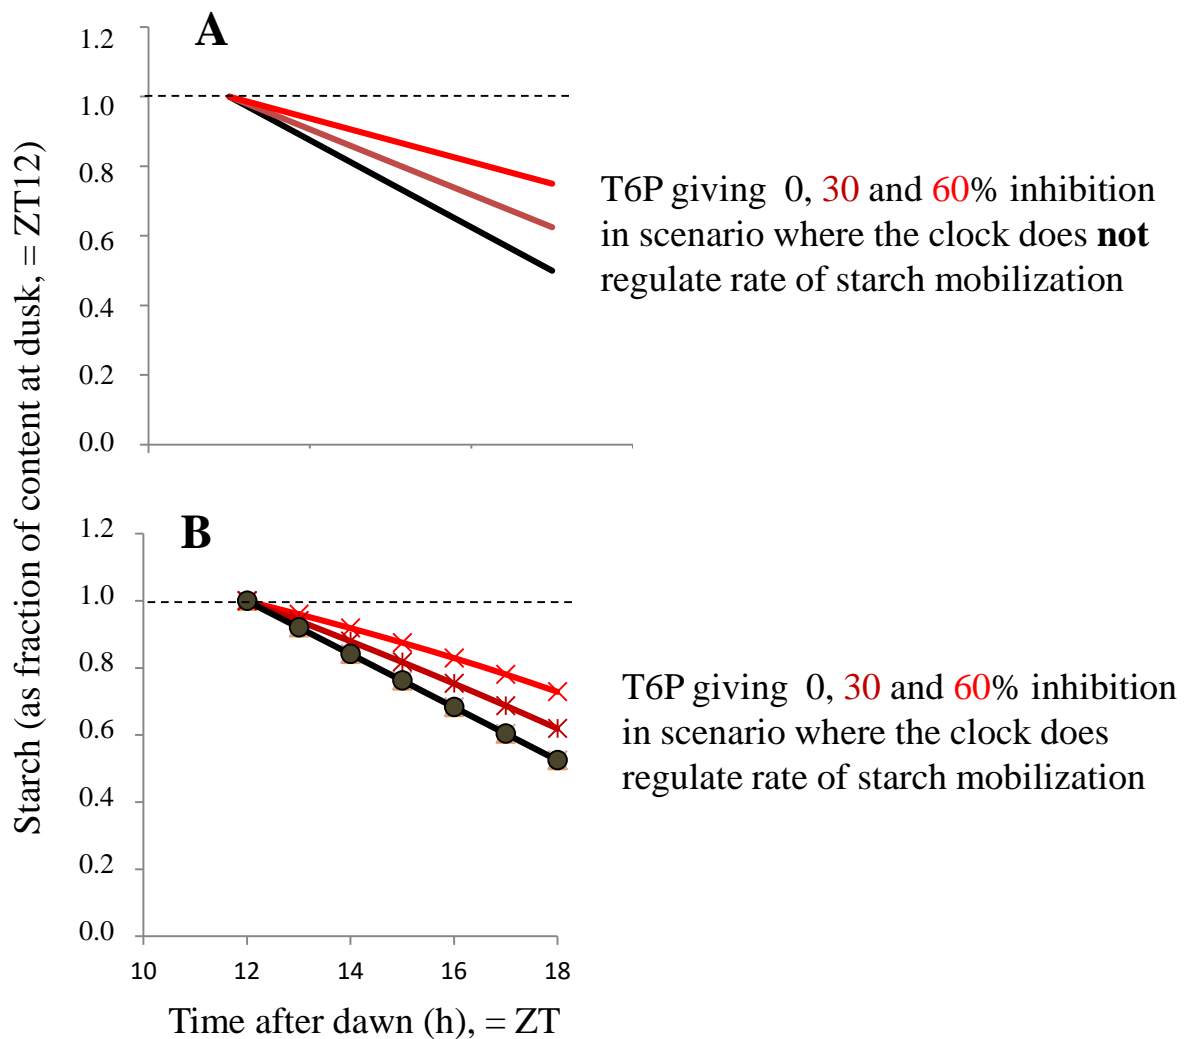

**Supplemental Figure S7. Model of the outcome when the inhibitory action of Tre6P occurs downstream of, and modifies, the rate of starch mobilization set by the clock.** The upper panel (A) shows a control simulation in which the rate of starch mobilization is reduced by 30 and 60% in a time-independent manner. The lower panel (B) shows a downstream interaction with a clock output that sets the rate of starch mobilization. Briefly, the rate of mobilization,  $R$ , is set according to the molecular division model as  $R = (S/T)$  where  $S$  is the amount of starch at that time and  $T$  is the time remaining until dawn. In the absence of any further factors, the set mobilization rate will decrease  $S$  proportionately with the decrease in  $T$  resulting in a constant rate of mobilization that exhausts starch at dawn. If a further factor like Tre6P depresses the rate of mobilization below  $R$  this will, over a time interval, result in a higher level of starch than would otherwise be the case (i.e.  $S$  does not decrease proportionately to  $T$ ). This increase in  $S$  relative to  $T$  will lead to a higher value of  $R$ , partly compensating for the inhibition by Tre6P. Black, brown and red denote models with zero, 30% and 60% inhibition by Tre6P.

The model is explained in more detail, with equations, in Suppl. Table S6.
